# Supplementary material
Source: publisher figshare collection journal article supplement (https://adisjournals.figshare.com/articles/dataset/_/27612660)
Supplement: Supplementary file 1 [file 1]

# Burden of Acute Respiratory Infections Caused by Influenza Virus, Respiratory Syncytial Virus, and SARS-CoV-2 with Consideration of Older Adults: A Narrative Review

William Hanage and William Schaffner (2024)

Influenza, RSV and SARS-CoV-2 cause substantial morbidity and mortality among older adults

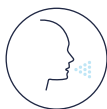

Cough

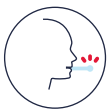

Fever

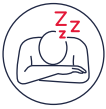

Fatigue

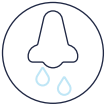

Runny nose

Delineating the disease burden of these common acute respiratory infections (ARIs) is complicated by shared symptomatology and clinical presentation

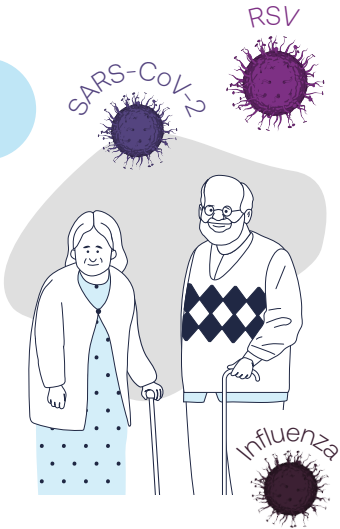

Accurate knowledge of viral epidemiology informs mitigation strategies and supports outbreak preparedness

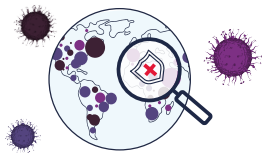

Regional, national, and global virologic and disease surveillance systems have been established for these ARIs to ensure continual viral monitoring

ARI health consequences and financial burden can extend beyond the acute phase of infection

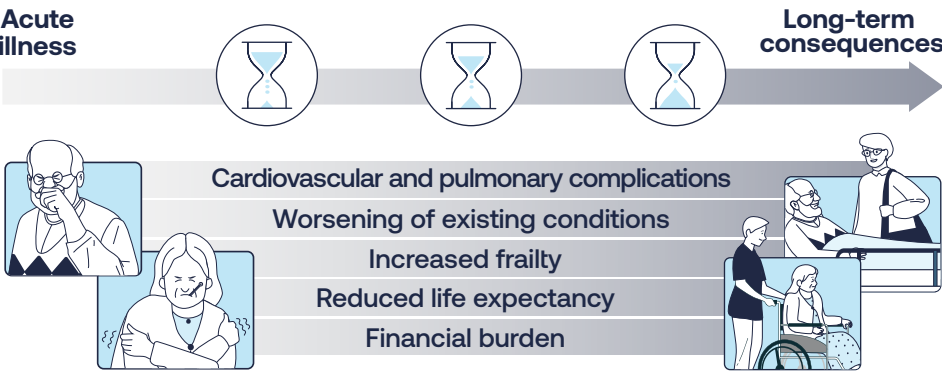

To improve health outcomes and reduce ARI disease burden, enhanced strategies are needed for:

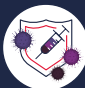

Prevention

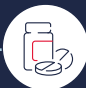

Treatment

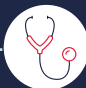

Management

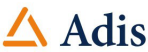

PEER-REVIEWED  
INFOGRAPHIC

## Disclosures

This graphical abstract represents the opinions of the authors. For a full list of declarations, including funding and author disclosure statements, and copyright information, please see the full text online.
